# Supplementary material for: The departure of sperm whales (Physeter macrocephalus) in response to the declining jumbo squid (Dosidicus gigas) population in the central portion of the Gulf of California
Source: PeerJ. 2024 Oct 8;12:e18117. doi: 10.7717/peerj.18117 (PMC11468805; doi:10.7717/peerj.18117)
Supplement: Supplemental Information 1 — Each observed individual is recorded with a unique identification code, sighting season, sighting date, photograph, number of recaptures, and seasons in which it was recaptured. Binary encounter history is also avaible for Mark software. [file peerj-12-18117-s001.xlsx]

## Sheet: Raw Data Base Photo-ID
Sperm Whale (Physeter macrocephalus) Raw Data Base 2009 - 2015
ID-Individual Code	Season	Capture Date	Photo	Total number of recaptures	Season 2010-2011	Recapture date	Photo	Season 2011-2012	Recapture Date	Photo	Season 2012-2013	Recapture Date	Photo	Season 2013-2014	Recapture Date	Photo	Season 2014-2015	Recapture Date	Photo							Encounter History for Mark
Pm_1	2009-2010	2010-03-18	Pm_20100318_S11_C-1817	0																1	0	0	0	0	0	Pm_1 100000
Pm_2	2009-2010	2010-03-18	Pm_20100318_S11_C-1845	0																1	0	0	0	0	0	Pm_2 100000
Pm_3	2009-2010	2010-03-18	Pm_20100318_S11_C-8576	0																1	0	0	0	0	0	Pm_3 100000
Pm_4	2009-2010	2010-05-13	Pm_20100513_S57_C-1145	0																1	0	0	0	0	0	Pm_4 100000
Pm_5	2009-2010	2010-05-13	Pm_20100513_S57_C-1153	0																1	0	0	0	0	0	Pm_5 100000
Pm_6	2009-2010	2010-05-13	Pm_20100513_S57_C-1165	0																1	0	0	0	0	0	Pm_6 100000
Pm_7	2009-2010	2010-05-13	Pm_20100513_S57_C-1176	0																1	0	0	0	0	0	Pm_7 100000
Pm_8	2009-2010	2010-05-13	Pm_20100513_S57_C-1207	0																1	0	0	0	0	0	Pm_8 100000
Pm_9	2009-2010	2010-05-13	Pm_20100513_S57_C-1220	0																1	0	0	0	0	0	Pm_9 100000
Pm_10	2009-2010	2010-05-13	Pm_20100513_S57_C-1230	0																1	0	0	0	0	0	Pm_10 100000
Pm_11	2009-2010	2010-05-13	Pm_20100513_S57_C-1236	0																1	0	0	0	0	0	Pm_11 100000
Pm_12	2009-2010	2010-05-13	Pm_20100513_S57_C-1244	0																1	0	0	0	0	0	Pm_12 100000
Pm_13	2009-2010	2010-05-13	Pm_20100513_S57_C-1247	0																1	0	0	0	0	0	Pm_13 100000
Pm_14	2009-2010	2010-05-13	Pm_20100513_S57_C-1254	0																1	0	0	0	0	0	Pm_14 100000
Pm_15	2009-2010	2010-05-13	Pm_20100513_S57_C-1258	1	2010-2011	2011-06-15	Pm_20110615_S199_N-1770													1	1	0	0	0	0	Pm_15 110000
Pm_16	2009-2010	2010-05-13	Pm_20100513_S57_C-1268	1	2010-2011	2011-07-08	Pm_20110708_S201_C-9370													1	1	0	0	0	0	Pm_16 110000
Pm_17	2009-2010	2010-05-13	Pm_20100513_S57_C-3678	0																1	0	0	0	0	0	Pm_17 100000
Pm_18	2009-2010	2010-05-13	Pm_20100513_S57_C-3729	0																1	0	0	0	0	0	Pm_18 100000
Pm_19	2009-2010	2010-05-13	Pm_20100513_S57_C-3773	0																1	0	0	0	0	0	Pm_19 100000
Pm_20	2009-2010	2010-05-13	Pm_20100513_S57_C-3817	0																1	0	0	0	0	0	Pm_20 100000
Pm_21	2009-2010	2010-05-13	Pm_20100513_S59_C-3894	0																1	0	0	0	0	0	Pm_21 100000
Pm_22	2009-2010	2010-06-03	Pm_20100603_S64_C-4903	0																1	0	0	0	0	0	Pm_22 100000
Pm_23	2009-2010	2010-06-03	Pm_20100603_S64_C-4911	0																1	0	0	0	0	0	Pm_23 100000
Pm_24	2009-2010	2010-06-28	Pm_20100628_S92_C-5639	0																1	0	0	0	0	0	Pm_24 100000
Pm_25	2009-2010	2010-06-28	Pm_20100628_S92_C-5647	0																1	0	0	0	0	0	Pm_25 100000
Pm_26	2009-2010	2010-06-28	Pm_20100628_S92_C-5652	0																1	0	0	0	0	0	Pm_26 100000
Pm_27	2009-2010	2010-06-28	Pm_20100628_S92_C-5659	0																1	0	0	0	0	0	Pm_27 100000
Pm_28	2009-2010	2010-06-28	Pm_20100628_S92_C-5691	0																1	0	0	0	0	0	Pm_28 100000
Pm_29	2009-2010	2010-06-28	Pm_20100628_S92_C-5696	0																1	0	0	0	0	0	Pm_29 100000
Pm_30	2009-2010	2010-06-28	Pm_20100628_S92_C-6956	0																1	0	0	0	0	0	Pm_30 100000
Pm_31	2009-2010	2010-06-28	Pm_20100628_S94_C-5714	0																1	0	0	0	0	0	Pm_31 100000
Pm_32	2009-2010	2010-06-28	Pm_20100628_S94_C-7052	0																1	0	0	0	0	0	Pm_32 100000
Pm_33	2009-2010	2010-06-29	Pm_20100629_S108_C-6469	1	2010-2011	2011-03-28	Pm_20110328_S171_C-4449													1	1	0	0	0	0	Pm_33 110000
Pm_34	2009-2010	2010-09-24	Pm_20100924_S117_C-7112	0																1	0	0	0	0	0	Pm_34 100000
Pm_35	2009-2010	2010-09-28	Pm_20100928_S131_C-7914	0																1	0	0	0	0	0	Pm_35 100000
Pm_36	2009-2010	2010-09-28	Pm_20100928_S131_C-7926	0																1	0	0	0	0	0	Pm_36 100000
Pm_37	2009-2010	2010-10-15	Pm_20101015_S39_C-8326	0																1	0	0	0	0	0	Pm_37 100000
Pm_38	2009-2010	2010-10-15	Pm_20101015_S39_C-8340	0																1	0	0	0	0	0	Pm_38 100000
Pm_39	2009-2010	2010-10-15	Pm_20101015_S39_C-8356	0																1	0	0	0	0	0	Pm_39 100000
Pm_40	2009-2010	2010-10-15	Pm_20101015_S39_C-8392	0																1	0	0	0	0	0	Pm_40 100000
Pm_41	2009-2010	2010-10-15	Pm_20101015_S39_C-8402	0																1	0	0	0	0	0	Pm_41 100000
Pm_42	2009-2010	2010-10-15	Pm_20101015_S39_C-8418	0																1	0	0	0	0	0	Pm_42 100000
Pm_43	2009-2010	2010-10-15	Pm_20101015_S39_N-4344	0																1	0	0	0	0	0	Pm_43 100000
Pm_44	2009-2010	2010-10-15	Pm_20101015_S39_N-4345	0																1	0	0	0	0	0	Pm_44 100000
Pm_45	2010-2011	2011-01-18	Pm_20110118_S55_C-1930	0																1	0	0	0	0	0	Pm_45 100000
Pm_46	2010-2011	2011-01-18	Pm_20110118_S55_C-1934	0																1	0	0	0	0	0	Pm_46 100000
Pm_47	2010-2011	2011-01-18	Pm_20110118_S55_C-1937	0																1	0	0	0	0	0	Pm_47 100000
Pm_48	2010-2011	2011-01-18	Pm_20110118_S55_C-1941	0																1	0	0	0	0	0	Pm_48 100000
Pm_49	2010-2011	2011-03-28	Pm_20110328_S171_C-3423	0																1	0	0	0	0	0	Pm_49 100000
Pm_50	2010-2011	2011-03-28	Pm_20110328_S171_C-3431	0																1	0	0	0	0	0	Pm_50 100000
Pm_51	2010-2011	2011-03-28	Pm_20110328_S171_C-4452	0																1	0	0	0	0	0	Pm_51 100000
Pm_52	2010-2011	2011-03-28	Pm_20110328_S171_C-4454	0																1	0	0	0	0	0	Pm_52 100000
Pm_53	2010-2011	2011-03-28	Pm_20110328_S171_C-4455	0																1	0	0	0	0	0	Pm_53 100000
Pm_54	2010-2011	2011-03-28	Pm_20110328_S171_C-4457	0																1	0	0	0	0	0	Pm_54 100000
Pm_55	2010-2011	2011-03-28	Pm_20110328_S171_C-4460	0																1	0	0	0	0	0	Pm_55 100000
Pm_56	2010-2011	2011-03-29	Pm_20110329_S64_N-0080	0																1	0	0	0	0	0	Pm_56 100000
Pm_57	2010-2011	2011-03-29	Pm_20110329_S64_N-0082	0																1	0	0	0	0	0	Pm_57 100000
Pm_58	2010-2011	2011-03-29	Pm_20110329_S64_N-0083	0																1	0	0	0	0	0	Pm_58 100000
Pm_59	2010-2011	2011-04-13	Pm_20110413_S178_C-4550	0																1	0	0	0	0	0	Pm_59 100000
Pm_60	2010-2011	2011-04-13	Pm_20110413_S178_C-4554	1				2011-2012	2012-01-16	Pm_20120116_S81_C-8920										1	0	1	0	0	0	Pm_60 101000
Pm_61	2010-2011	2011-05-07	Pm_20110507_S74_C-4660	0																1	0	0	0	0	0	Pm_61 100000
Pm_62	2010-2011	2011-05-07	Pm_20110507_S74_C-4665	0																1	0	0	0	0	0	Pm_62 100000
Pm_63	2010-2011	2011-05-07	Pm_20110507_S74_C-4670	1							2012-2013	2013-10-24	Pm_20131024_S480-C-6533							1	0	0	1	0	0	Pm_63 100100
Pm_64	2010-2011	2011-05-07	Pm_20110507_S74_C-4676	0																1	0	0	0	0	0	Pm_64 100000
Pm_65	2010-2011	2011-05-07	Pm_20110507_S74_C-4682	2				2011-2012	2012-10-04	Pm_20121004_S355_C-2514	2012-2013	2013-10-24	Pm_20131024_S480-C-6512							1	0	1	1	0	0	Pm_65 101100
Pm_66	2010-2011	2011-05-07	Pm_20110507_S74_C-4694	2				2011-2012	2012-10-04	Pm_20121004_S355_C-2530	2012-2013	24/10/2013	Pm_20131024_S480-C-6522							1	0	1	1	0	0	Pm_66 101100
Pm_67	2010-2011	2011-05-07	Pm_20110507_S74_C-4700	0																1	0	0	0	0	0	Pm_67 100000
Pm_68	2010-2011	2011-05-07	Pm_20110507_S74_C-4716	1							2012-2013	2013-10-24	Pm_20131024_S480-C-6640							1	0	0	1	0	0	Pm_68 100100
Pm_69	2010-2011	2011-05-07	Pm_20110507_S74_C-4719	1							2012-2013	2013-10-24	Pm_20131024_S480-C-6610							1	0	0	1	0	0	Pm_69 100100
Pm_70	2010-2011	2011-06-10	Pm_20110610_S191_N-0061	0																1	0	0	0	0	0	Pm_70 100000
Pm_71	2010-2011	2011-06-15	Pm_20110615_S199_C-8735	0																1	0	0	0	0	0	Pm_71 100000
Pm_72	2010-2011	2011-06-15	Pm_20110615_S199_C-8773	0																1	0	0	0	0	0	Pm_72 100000
Pm_73	2010-2011	2011-06-15	Pm_20110615_S199_N-1763	0																1	0	0	0	0	0	Pm_73 100000
Pm_74	2010-2011	2011-06-15	Pm_20110615_S199_C-8781	0																1	0	0	0	0	0	Pm_74 100000
Pm_75	2010-2011	2011-07-08	Pm_20110708_S201_C-0635	0																1	0	0	0	0	0	Pm_75 100000
Pm_76	2010-2011	2011-07-08	Pm_20110708_S201_C-9342	0																1	0	0	0	0	0	Pm_76 100000
Pm_77	2010-2011	2011-07-08	Pm_20110708_S201_C-9345	0																1	0	0	0	0	0	Pm_77 100000
Pm_78	2010-2011	2011-07-08	Pm_20110708_S201_C-9352	0																1	0	0	0	0	0	Pm_78 100000
Pm_79	2010-2011	2011-07-08	Pm_20110708_S201_C-9364	0																1	0	0	0	0	0	Pm_79 100000
Pm_80	2010-2011	2011-07-08	Pm_20110708_S201_N-5122	0																1	0	0	0	0	0	Pm_80 100000
Pm_81	2010-2011	2011-07-08	Pm_20110708_S202_C-0984	0																1	0	0	0	0	0	Pm_81 100000
Pm_82	2010-2011	2011-07-08	Pm_20110708_S202_C-9595	0																1	0	0	0	0	0	Pm_82 100000
Pm_83	2010-2011	2011-07-08	Pm_20110708_S202_C-9599	0																1	0	0	0	0	0	Pm_83 100000
Pm_84	2010-2011	2011-07-08	Pm_20110708_S202_C-9602	0																1	0	0	0	0	0	Pm_84 100000
Pm_85	2010-2011	2011-07-08	Pm_20110708_S202_C-9604	0																1	0	0	0	0	0	Pm_85 100000
Pm_86	2010-2011	2011-07-08	Pm_20110708_S202_C-9607	0																1	0	0	0	0	0	Pm_86 100000
Pm_87	2010-2011	2011-07-08	Pm_20110708_S202_C-9612	0																1	0	0	0	0	0	Pm_87 100000
Pm_88	2010-2011	2011-07-08	Pm_20110708_S202_N-5598	0																1	0	0	0	0	0	Pm_88 100000
Pm_89	2010-2011	2011-07-13	Pm_20110713_S207_C-0017	0																1	0	0	0	0	0	Pm_89 100000
Pm_90	2010-2011	2011-07-13	Pm_20110713_S207_C-0021	0																1	0	0	0	0	0	Pm_90 100000
Pm_91	2010-2011	2011-07-13	Pm_20110713_S207_C-0024	0																1	0	0	0	0	0	Pm_91 100000
Pm_92	2010-2011	2011-07-13	Pm_20110713_S207_C-0027	0																1	0	0	0	0	0	Pm_92 100000
Pm_93	2010-2011	2011-07-13	Pm_20110713_S207_C-2004	0																1	0	0	0	0	0	Pm_93 100000
Pm_94	2010-2011	2011-07-13	Pm_20110713_S207_C-2059	0																1	0	0	0	0	0	Pm_94 100000
Pm_95	2010-2011	2011-07-13	Pm_20110713_S207_C-2066	0																1	0	0	0	0	0	Pm_95 100000
Pm_96	2010-2011	2011-08-12	Pm_20110812_S214_C-3908	0																1	0	0	0	0	0	Pm_96 100000
Pm_97	2010-2011	2011-09-13	Pm_20110913_S219_C-4105	0																1	0	0	0	0	0	Pm_97 100000
Pm_98	2010-2011	2011-09-13	Pm_20110913_S219_C-4110	0																1	0	0	0	0	0	Pm_98 100000
Pm_99	2010-2011	2011-09-13	Pm_20110913_S219_C-4117	0																1	0	0	0	0	0	Pm_99 100000
Pm_100	2010-2011	2011-09-13	Pm_20110913_S219_C-4123	0																1	0	0	0	0	0	Pm_100 100000
Pm_101	2010-2011	2011-09-13	Pm_20110913_S219_C-4142	0																1	0	0	0	0	0	Pm_101 100000
Pm_102	2010-2011	2011-09-13	Pm_20110913_S220_C-4332	0																1	0	0	0	0	0	Pm_102 100000
Pm_103	2010-2011	2011-09-25	Pm_20110913_S225_C-4522	0																1	0	0	0	0	0	Pm_103 100000
Pm_104	2011-2012	2012-01-16	Pm_20120116_S81_C-0329	0																1	0	0	0	0	0	Pm_104 100000
Pm_105	2011-2012	2012-01-16	Pm_20120906_S345_C-0941	0																1	0	0	0	0	0	Pm_105 100000
Pm_106	2011-2012	2012-01-16	Pm_20120116_S81_C-8910	0																1	0	0	0	0	0	Pm_106 100000
Pm_107	2011-2012	2012-01-16	Pm_20120116_S81_C-8914	0																1	0	0	0	0	0	Pm_107 100000
Pm_108	2011-2012	2012-02-15	Pm_20120215_S294_C-1545	0																1	0	0	0	0	0	Pm_108 100000
Pm_109	2011-2012	2012-03-05	Pm_20120305_S299_C-2449	0																1	0	0	0	0	0	Pm_109 100000
Pm_110	2011-2012	2012-03-24	Pm_20120324_S308_C-5343	0																1	0	0	0	0	0	Pm_110 100000
Pm_111	2011-2012	2012-03-24	Pm_20120324_S308_C-5362	3							2012-2013	2012-12-07	Pm_20131003_S473_C-6182	2013-2014	2014-11-03	Pm_20140311-S588-C-2021	2014-2015	2015-09-03	Pm_20150309-S817-C-6730	1	0	0	1	1	1	Pm_111 100111
Pm_112	2011-2012	2012-07-06	Pm_20120706_S337_C-0094	0																1	0	0	0	0	0	Pm_112 100000
Pm_113	2011-2012	2012-09-06	Pm_20120906_S345_C-0948	0																1	0	0	0	0	0	Pm_113 100000
Pm_114	2011-2012	2012-09-06	Pm_20120906_S345_C-0953	0																1	0	0	0	0	0	Pm_114 100000
Pm_115	2011-2012	2012-09-06	Pm_20120906_S345_C-0958	0																1	0	0	0	0	0	Pm_115 100000
Pm_116	2011-2012	2012-10-04	Pm_20121004_S355_C-2524	1							2012-2013	2013-10-24	Pm_20131024_S480-C-6548							1	0	0	1	0	0	Pm_116 100100
Pm_117	2011-2012	2012-10-23	Pm_20121023_S361_C-3290	0																1	0	0	0	0	0	Pm_117 100000
Pm_118	2011-2012	2012-10-23	Pm_20121023_S361_C-3291	0																1	0	0	0	0	0	Pm_118 100000
Pm_119	2011-2012	2012-11-01	Pm_20121101_S366_C-0301	0																1	0	0	0	0	0	Pm_119 100000
Pm_120	2011-2012	2012-11-01	Pm_20121101_S366_C-0309	1							2012-2013	2013-07-30	Pm_20130730_S453-C-5290							1	0	0	1	0	0	Pm_120 100100
Pm_121	2011-2012	2012-11-01	Pm_20121101_S367_C-0336	0																1	0	0	0	0	0	Pm_121 100000
Pm_122	2012-2013	2012-12-07	Pm_20121207_S371_C-2142	0																1	0	0	0	0	0	Pm_122 100000
Pm_123	2012-2013	2013-03-19	Pm_20131029_S485-C-7269	1													2014-2015	2015-09-03	Pm_20150309-S817-C-6738	1	0	0	0	0	1	Pm_123 100001
Pm_124	2012-2013	2013-03-19	Pm_20130319_S389_C-8953	1										2013-2014	2014-11-03	Pm_20140311-S588-C-1947				1	0	0	0	1	0	Pm_124 100010
Pm_125	2012-2013	2013-03-19	Pm_20130319_S389_C-8959	0																1	0	0	0	0	0	Pm_125 100000
Pm_126	2012-2013	2013-07-30	Pm_20130730_S452-C-5263	0																1	0	0	0	0	0	Pm_126 100000
Pm_127	2012-2013	2013-07-30	Pm_20130730_S452-C-5270	0																1	0	0	0	0	0	Pm_127 100000
Pm_128	2012-2013	2013-07-30	Pm_20130730_S453-C-5280	1										2013-2014	24/09/2014	Pm_20140923-S712-C-9281				1	0	0	0	1	0	Pm_128 100010
Pm_129	2012-2013	2013-08-09	Pm_20130809_S466-C-5889	0																1	0	0	0	0	0	Pm_129 100000
Pm_130	2012-2013	2013-08-09	Pm_20130809_S466-C-5895	0																1	0	0	0	0	0	Pm_130 100000
Pm_131	2012-2013	2013-10-03	Pm_20131003_S475-C-6199	0																1	0	0	0	0	0	Pm_131 100000
Pm_132	2012-2013	2013-10-03	Pm_20131003_S475-C-6206	0																1	0	0	0	0	0	Pm_132 100000
Pm_133	2012-2013	2013-10-24	Pm_20131024_S480-C-6538	0																1	0	0	0	0	0	Pm_133 100000
Pm_134	2012-2013	2013-10-24	Pm_20131024_S480-C-6570	0																1	0	0	0	0	0	Pm_134 100000
Pm_135	2012-2013	2013-10-24	Pm_20131024_S483-C-6680	0																1	0	0	0	0	0	Pm_135 100000
Pm_136	2012-2013	2013-10-24	Pm_20131024_S483-C-6688	0																1	0	0	0	0	0	Pm_136 100000
Pm_137	2013-2014	2014-11-03	Pm_20140311-S588-C-1939	1													2014-2015	2015-09-03	Pm_20150309-S817-C-6706	1	0	0	0	0	1	Pm_137 100001
Pm_138	2013-2014	2014-11-03	Pm_20140311-S588-C-1985	0																1	0	0	0	0	0	Pm_138 100000
Pm_139	2013-2014	2014-11-03	Pm_20140311-S588-C-1997	0																1	0	0	0	0	0	Pm_139 100000
Pm_140	2013-2014	2014-11-03	Pm_20140311-S588-C-2028	1													2014-2015	2015-09-03	Pm_20150309-S817-C-6716	1	0	0	0	0	1	Pm_140 100001
Pm_141	2013-2014	2014-11-03	Pm_20140311-S588-C-2045	0																1	0	0	0	0	0	Pm_141 100000
Pm_142	2013-2014	15/07/2014	Pm_20140715-S705-C-8969	1													2014-2015	2015-09-03	Pm_20150309-S817-C-6708	1	0	0	0	0	1	Pm_142 100001
Pm_143	2013-2014	15/07/2014	Pm_20140715-S705-C-8982	0																1	0	0	0	0	0	Pm_143 100000
Pm_144	2013-2014	15/07/2014	Pm_20140715-S705-C-8990	0																1	0	0	0	0	0	Pm_144 100000
Pm_145	2013-2014	15/07/2014	Pm_20140715-S705-C-8994	0																1	0	0	0	0	0	Pm_145 100000
Pm_146	2013-2014	15/07/2014	Pm_20140715-S705-C-9005	0																1	0	0	0	0	0	Pm_146 100000
Pm_147	2013-2014	15/07/2014	Pm_20140715-S705-C-9010	0																1	0	0	0	0	0	Pm_147 100000
Pm_148	2013-2014	15/07/2014	Pm_20140715-S705-C-9017	0																1	0	0	0	0	0	Pm_148 100000
Pm_149	2013-2014	15/07/2014	Pm_20140715-S705-C-9029	0																1	0	0	0	0	0	Pm_149 100000
Pm_150	2013-2014	15/07/2014	Pm_20140715-S705-C-9036	0																1	0	0	0	0	0	Pm_150 100000
Pm_151	2013-2014	15/07/2014	Pm_20140715-S705-C-9042	0																1	0	0	0	0	0	Pm_151 100000
Pm_152	2013-2014	15/07/2014	Pm_20140715-S705-C-9148	0																1	0	0	0	0	0	Pm_152 100000
Pm_153	2013-2014	15/07/2014	Pm_20140715-S705-C-9166	0																1	0	0	0	0	0	Pm_153 100000
Pm_154	2013-2014	15/07/2014	Pm_20140715-S705-C-9171	0																1	0	0	0	0	0	Pm_154 100000
Pm_155	2013-2014	15/07/2014	Pm_20140715-S705-C-9175	0																1	0	0	0	0	0	Pm_155 100000
Pm_156	2013-2014	15/07/2014	Pm_20140715-S706-C-9181	0																1	0	0	0	0	0	Pm_156 100000
Pm_157	2013-2014	15/07/2014	Pm_20140715-S706-C-9184	0																1	0	0	0	0	0	Pm_157 100000
Pm_158	2013-2014	24/09/2014	Pm_20140923-S712-C-9254	0																1	0	0	0	0	0	Pm_158 100000
Pm_159	2013-2014	24/09/2014	Pm_20140923-S712-C-9259	0																1	0	0	0	0	0	Pm_159 100000
Pm_160	2013-2014	24/09/2014	Pm_20140923-S712-C-9266	0																1	0	0	0	0	0	Pm_160 100000
Pm_161	2013-2014	24/09/2014	Pm_20140923-S712-C-9270	0																1	0	0	0	0	0	Pm_161 100000
Pm_162	2013-2014	24/09/2014	Pm_20140923-S712-C-9276	0																1	0	0	0	0	0	Pm_162 100000
Pm_163	2013-2014	24/09/2014	Pm_20140923-S714-C-9357	0																1	0	0	0	0	0	Pm_163 100000
Pm_164	2014-2015	2015-09-03	Pm_20150309-S817-C-6703	0																1	0	0	0	0	0	Pm_164 100000
Pm_165	2014-2015	2015-09-03	Pm_20150309-S817-C-6722	0																1	0	0	0	0	0	Pm_165 100000
Pm_166	2014-2015	13/07/2015	Pm_20150713-S879-C_4661	0																1	0	0	0	0	0	Pm_166 100000
Pm_167	2014-2015	13/07/2015	Pm_20150713-S882-C_4711	0																1	0	0	0	0	0	Pm_167 100000
				22

## Sheet: Photo-ID recaptures
Sperm Whale photo-identification recaptures between 2009-2015 in the Eastern Midriff Islands Region of the Gulf of California
ID individual Code	Spring	Summer	Fall	Winter	Spring	Summer	Fall	Winter	Spring	Summer	Fall	Winter	Spring	Summer	Fall	Winter	Spring	Summer	Fall	Winter	Spring
	2010			2011				2012				2013				2014				2015
Pm_015	X					X
Pm_016	X					X
Pm_033		X			X
Pm_060					X			X
Pm_063					X										X
Pm_065					X						X				X
Pm_066					X						X				X
Pm_068					X										X
Pm_069					X										X
Pm_111									X						X				X		X
Pm_116											X				X
Pm_120											X			X
Pm_123															X						X
Pm_124													X						X
Pm_128														X					X
Pm_137																	X				X
Pm_140																	X				X
Pm_142																		X			X
